# Supplementary material for: MiR-183-5p Induced by Saturated Fatty Acids Hinders Insulin Signaling by Downregulating IRS-1 in Hepatocytes
Source: MDPI journal article supplement (doi:10.3390/ijms23062979), 2022-03-10
Supplement: s1 [file s1]

Table S1. Oligonucleotide sequences for transfection

| Gene                | Primer sequence (5'-3')  |
|---------------------|--------------------------|
| scRNA (control RNA) | UCACAACCUCCUAGAAAGAGUAGA |
| miR-183-5p          | UAUGGCACUGGUAGAAUUCACU   |
| antimiR-183         | AGUGAAUUCUACCAGUGGATG    |

**Table S2. Primer lists and conditions for *q*RT-PCR, RT-PCR, and cloning**

(A) Human primer lists for *q*RT-PCR and RT-PCR

| Gene                   | Primer sequence (5′-3′) |                                    | Product size | Annealing Temperature | Concentration |        | Cycle |
|------------------------|-------------------------|------------------------------------|--------------|-----------------------|---------------|--------|-------|
|                        |                         |                                    |              |                       | cDNA          | Primer |       |
| miR-183-5p             | F.P                     | TATGGCACTGGTAGAATTCACT             | 90           | 55                    | 2 ng/μl       | 0.5 μM | 40    |
| miRNA universal Primer | R.P                     | miScript universal primer (Qiagen) |              |                       |               |        |       |
| IRS1                   | F.P                     | GTTTCCAGAAGCAGCCAGAG               | 474          | 60                    |               |        |       |
|                        | R.P                     | ACTCTCTCCACCCAACGTGA               |              |                       |               |        |       |
| U6                     | F.P                     | CTCGCTTCGGCAGCACA                  | 94           | 58                    |               |        |       |
|                        | R.P                     | AACGCTTCACGAATTTGCGT               |              |                       |               |        |       |
| β-Actin                | F.P                     | TCACCCACACTGTGCCCATCTACGA          | 348          | 58                    |               |        |       |
|                        | R.P                     | GGATGCCACAGGATTCCATACCCA           |              |                       |               |        |       |

(B) Primer lists for wild-type and mutant 3'UTR cloning

| Gene             | Primer sequence (5′-3′) |                       | Product size | Annealing Temperature | Concentration |        | Cycle |
|------------------|-------------------------|-----------------------|--------------|-----------------------|---------------|--------|-------|
|                  |                         |                       |              |                       | cDNA          | Primer |       |
| <i>wt</i> -IRS1  | F.P                     | TTGGATGTGGGATGGAGGTA  | 275          | 58                    | 2 ng/μl       | 0.5 μM | 35    |
|                  | R.P                     | AACATGGCCTATTGTCTTAC  |              |                       |               |        |       |
| <i>mut</i> -IRS1 | F.P                     | GAATCATAGTCGGATAGATGG | 146          |                       |               |        |       |
|                  | R.P                     | AACATGGCCTATTGTCTTAC  |              |                       |               |        |       |
|                  | F.P                     | TTGGATGTGGGATGGAGGTA  | 150          |                       |               |        |       |
|                  | R.P                     | CCATCTATCCGACTATGATTC |              |                       |               |        |       |

**Table S3. Antibodies list**

| Antibody                              | Type       | Targeted species | Manufacturer                                          | Cat. No. | Dilution ratio* |
|---------------------------------------|------------|------------------|-------------------------------------------------------|----------|-----------------|
| IRS-1                                 | Polyclonal | Rabbit           | Millipore, Burlington, MA, USA                        | #06-248  | 1:5,000         |
| Phospho IRS-1(Tyr612)                 | Polyclonal | Rabbit           | Invitrogen, Thermofisher Scientific, Waltham, MA, USA | Sc250575 | 1:2,000         |
| INSR                                  | Monoclonal | Mouse            | Cell Signaling Technology, Danvers, MA, USA           | #3020    | 1:3,000         |
| Phospho INSR (Tyr1150/1151)           | Monoclonal | Rabbit           | Cell Signaling Technology, Danvers, MA, USA           | #3024    | 1:3,000         |
| Akt2                                  | Polyclonal | Rabbit           | Cell Signaling Technology, Danvers, MA, USA           | #9272    | 1:10,000        |
| Phospho Akt2 (Ser474)                 | Polyclonal | Rabbit           | Cell Signaling Technology, Danvers, MA, USA           | #8599    | 1:10,000        |
| GSK3 $\beta$                          | Monoclonal | Rabbit           | Cell Signaling Technology, Danvers, MA, USA           | #9315    | 1:10,000        |
| Phospho GSK3 $\beta$ (Ser21/9)        | Polyclonal | Rabbit           | Cell Signaling Technology, Danvers, MA, USA           | #9331    | 1:10,000        |
| $\beta$ -actin                        | Monoclonal | Rabbit           | Sigma-Aldrich Chemical, St. Louis, Missouri, USA      | A2066    | 1:10,000        |
| Antibodies HRP-linked anti-rabbit IgG |            |                  | Cell Signaling Technology, Danvers, MA, USA           | #7074    | 1:10,000        |
| Goat anti-mouse(H+L)                  |            |                  | Invitrogen, Thermofisher Scientific, Waltham, MA, USA | #32430   | 1:2,000         |

\*All blots were visualized using a Femto reagent (Thermofisher Scientific).

**Table S4. Diet compositions**

(A) Normal fat diet (NFD; Purina Laboratory Rodent Diet 38057)

| Calories (%) |       | Fat component of total fat (gram%) |                            |                      |
|--------------|-------|------------------------------------|----------------------------|----------------------|
|              |       | Saturated fatty acid               | Unsaturated Fatty acids    | Unidentified fat     |
| Fat          | 12.41 | Arachidonic Acid (4.42)            | Omega-3 fatty acid (24.55) | Unidentified (44.23) |
| Carbohydrate | 63.07 |                                    | Linoleic acid (24.15)      |                      |
| Protein      | 24.52 |                                    | Linolenic acid (2.65)      |                      |
| Total        | 100   | 4.42 of total fat                  | 51.35 of total fat         | 44.23 of total fat   |

(B) High-fat diet (HFD; D12492)

| Calories (%) |     | Fat component of total fat (gram%)                                       |                                                                             |
|--------------|-----|--------------------------------------------------------------------------|-----------------------------------------------------------------------------|
|              |     | Saturated fatty acid                                                     | Unsaturated Fatty acids                                                     |
| Fat          | 60  | Palmitic acid (19.64)<br>Stearic acid (10.59)<br>Myristoleic acid (1.10) | Oleic acid (33.68)<br>Linoleic acid (28.37)                                 |
| Carbohydrate | 20  | Lau acid (0.8)<br>Margaric acid (0.35)<br>Arachidic acid (0.16)          | Linolenic acid (2.04)<br>Arachidonic acid (1.78)<br>Palmitoleic acid (1.33) |
| Protein      | 20  | Pentadecanoic acid (0.08)<br>Capric acid (0.04)                          | Docosapentaenoic acid (0.78)                                                |
| Total        | 100 | 32 of total fat                                                          | 68 of total fat                                                             |
